# Supplementary material for: Insertion behavior of imidazolium and pyrrolidinium based ionic liquids into α and β-cyclodextrins: mechanism and factors leading to host–guest inclusion complexes
Source: Royal Society of Chemistry journal article supplement (doi:10.1039/c6ra19684e), 2016-01-01
Supplement: c6ra19684e1.pdf [file c6ra19684e1.pdf]

## Electronic Supporting Information

### **Insertion behavior of imidazolium and pyrrolidinium based ionic liquids into $\alpha$ and $\beta$ -cyclodextrins: Mechanism and factors leading to host-guest inclusion complexes**

Aditi Roy, Subhadeep Saha, Biswajit Datta and Mahendra Nath Roy\*

---

\*Department of Chemistry, University of North Bengal, Darjeeling-734013, India.

Email: [mahendraroy2002@yahoo.co.in](mailto:mahendraroy2002@yahoo.co.in)

---

#### **Theory:**

##### **Surface tension**

Concentration of cyclodextrin and corresponding surface tension at which maximum inclusion took place (break point at the curve) have been calculated by solving the equations of two intercepting straight lines and represented in table 1. For instance, in case of the ionic liquid [BMIm]Cl and  $\alpha$ -cyclodextrin system

$$\gamma = 5.360 c + 41.21 \quad (S1)$$

$$\gamma = 0.710 c + 65.24 \quad (S2)$$

Solving equation (1) and (2),

$$\gamma = 68.91 \text{ mN}\cdot\text{m}^{-1} \text{ and } c = 5.18 \text{ mM}$$

Concentration of ionic liquid at the break point has been estimated from the mutual concentration chart of table S4-S7.

##### **Conductivity**

The concentration and corresponding conductivity at which maximum inclusion took place (break point at the curve) have been calculated by solving the equations of two intercepting straight lines and represented in table 2. For instance, in case of the ionic liquid [BMP]Cl and  $\beta$ -cyclodextrin system

$$\kappa = -0.449c + 5.224 \quad (S3)$$

$$\kappa = -0.16 c + 3.775 \quad (S4)$$

Solving equation (3) and (4),

$$\kappa = 2.974 \text{ mS}\cdot\text{m}^{-1} \text{ and } c = 5.013 \text{ mM}$$

Concentration of ionic liquid at the break point has been estimated from the mutual concentration chart of table S4-S7.

- The physical properties of binary aqueous mixtures in different mass fractions ( $w_n=0.001, 0.003, 0.005$ , where  $n = 1, 2$  for  $\alpha$  and  $\beta$ -CD respectively) of  $\alpha$  and  $\beta$ -CD at 298.15K have been reported in table S2. The experimental measured values of density, viscosity and refractive index of selected two ionic liquids [BMIm]Cl and [BMP]Cl in different mass fractions of aqueous  $\alpha$  and  $\beta$ -CD mixture have been listed in table S3 as a function of concentration (molality).

### Apparent molar volume

The apparent molar volumes  $\phi_V$  were determined from the solutions densities using the equation and given in table S8.

$$\phi_V = M / \rho - 1000(\rho - \rho_o) / m\rho\rho_o \quad (\text{S5})$$

where  $M$  is the molar mass of the ionic liquids,  $m$  is the molality of the solution,  $\rho$  and  $\rho_o$  are the density of the solution and aqueous  $\alpha$  and  $\beta$ -CD mixture respectively.

The limiting apparent molar volumes  $\phi_V^0$  were obtained by a least-square treatment to the plots of  $\phi_V$  versus  $\sqrt{m}$  using the Masson equation<sup>1</sup> and shown in table S9.

$$\phi_V = \phi_V^0 + S_V^* \cdot \sqrt{m} \quad (\text{S6})$$

The standard deviations ( $\sigma$ ) were determined using the following equation:

$$\sigma = \sqrt{[\sum (Y_{\text{exp}} - Y_{\text{obs}})^2 / (N - 1)]} \quad (\text{S7})$$

where  $N$  is the number of data points.

### Viscosity

The experimental viscosity data for the studied systems are listed in table S3. The relative viscosity ( $\eta_r$ ) has been analyzed using the Jones-Dole equation<sup>2</sup>

$$(\eta/\eta_o - 1)/\sqrt{m} = (\eta_r - 1)/\sqrt{m} = A + B\sqrt{m} \quad (S8)$$

where  $\eta_r = \eta/\eta_o$ ,  $\eta$  and  $\eta_o$  are the relative viscosities, the viscosities of the ternary solutions (ionic liquid + aq. CD) and binary aqueous mixture (aq. CD) and  $m$  is the molality of the ionic liquids in ternary solutions.  $A$  and  $B$  are empirical constants known as viscosity  $A$  and  $B$ -coefficients, which are specific to solute-solute and solute-solvent interactions respectively and have been estimated by least-square method by plotting  $(\eta_r - 1)/\sqrt{m}$  against  $\sqrt{m}$  and reported in table S8.

### Refractive index

The molar refraction,  $R_M$  can be evaluated from the Lorentz-Lorenz relation <sup>3</sup>

$$R_M = \{(n_D^2 - 1)/(n_D^2 + 2)\}(M/\rho) \quad (S9)$$

where  $R_M$ ,  $n_D$ ,  $M$  and  $\rho$  are the molar refraction, the refractive index, the molar mass and the density of solution respectively. The Limiting molar refraction ( $R_M^o$ ) have been estimated from the following relation and reported in table S9,<sup>4</sup>

$$R_M = R_M^o + R_S\sqrt{m} \quad (S10)$$

### References:

- (1) D.O. Masson, *Phil Mag.* **1929**, *8*, 218-223.
- (2) G. Jones, D. Dole, *J. Am. Chem. Soc.* **1929**, *51*, 2950-2964.
- (3) V.Minkin, O. Osipov, Y. Zhdanov, *Dipole Moments in Organic Chemistry*. New York, Plenum Press, **1970**.
- (4) M.N. Roy, D. Ekka, S. Saha, M. C. Roy, *RSC Adv.* **2014**, *4*, 42383-42390.

### Tables:

**Table S1. <sup>1</sup>H NMR data of [BMIm]Cl, [BMP]Cl,  $\alpha$ -CD,  $\beta$ -CD and inclusion complexes**

| [BMIm]Cl (300MHz, Solv: D <sub>2</sub> O)<br>$\delta$ /ppm                                                                                                            | [BMP]Cl (300MHz, Solv: D <sub>2</sub> O)<br>$\delta$ /ppm                                                                                |
|-----------------------------------------------------------------------------------------------------------------------------------------------------------------------|------------------------------------------------------------------------------------------------------------------------------------------|
| 0.87-0.92 (3H, t, $J = 7.26$ Hz), 1.26-1.33(2H, m),<br>1.78-1.85 (2H, m), 3.87 (3H, s), 4.15-4.20 (2H, t, $J =$<br>7.11 Hz), 7.40 (1H, s), 7.45 (1H, s), 8.69 (1H, s) | 0.91-0.96 (3H, t, $J = 7.29$ Hz), 1.34-1.41 (2H, m),<br>1.74-1.81(2H,m), 2.19 (4H, m), 3.02 (3H, s), 3.28-<br>3.34 (2H, m), 3.48 (4H, m) |
| $\alpha$ -Cyclodextrin (500 MHz, Solv: D <sub>2</sub> O)<br>$\delta$ /ppm                                                                                             | $\beta$ -Cyclodextrin (400 MHz, Solv: D <sub>2</sub> O)<br>$\delta$ /ppm                                                                 |
| 3.48-3.51 (6H, t, $J = 9.00$ Hz), 3.53-3.56 (6H, dd, $J =$                                                                                                            | 3.49-3.54 (6H, t, $J = 9.2$ Hz), 3.57-3.60 (6H, dd, $J =$                                                                                |

|                                                                                                                                                                                                                                                                                                                                |                                                                                                                                                                                                                                                                                                   |
|--------------------------------------------------------------------------------------------------------------------------------------------------------------------------------------------------------------------------------------------------------------------------------------------------------------------------------|---------------------------------------------------------------------------------------------------------------------------------------------------------------------------------------------------------------------------------------------------------------------------------------------------|
| 10.00, 3.00 Hz), 3.74-3.83 (18H, m), 3.87-3.91 (6H, t, $J = 9$ Hz), 4.96-4.97 (6H, d, $J = 3$ Hz)                                                                                                                                                                                                                              | 9.6, 3.2 Hz), 3.79-3.84 (18H, m), 3.87-3.92 (6H, t, $J = 9.2$ Hz), 5.00-5.01 (6H, d, $J = 3.6$ Hz)                                                                                                                                                                                                |
| [BMIm]Cl- $\alpha$ -CD<br>(1:1 molar ratio, 300 MHz, Solv: D <sub>2</sub> O)<br>$\delta$ /ppm                                                                                                                                                                                                                                  | [BMP]Cl- $\alpha$ -CD<br>(1:1 molar ratio, 300 MHz, Solv: D <sub>2</sub> O)<br>$\delta$ /ppm                                                                                                                                                                                                      |
| 0.84-0.89 (3H, t, $J = 7.26$ Hz), 1.22-1.29 (2H, m), 1.74-1.81 (2H, m), 3.48-3.51 (6H, t, $J = 9.00$ Hz), 3.53-3.56 (6H, dd, $J = 10.00, 3.00$ Hz), 3.71-3.79 (18H, m), 3.80-3.83 (6H, t, $J = 9$ Hz), 3.84 (3H, s), 4.11-4.16 (2H, t, $J = 7.11$ Hz), 4.96-4.97 (6H, d, $J = 3$ Hz), 7.40 (1H, s), 7.45 (1H, s), 8.69 (1H, s) | 0.88-0.93 (3H, t, $J = 7.29$ Hz), 1.31-1.38 (2H, m), 1.71-1.78 (2H, m), 2.19 (4H, m), 3.00 (3H, s), 3.25-3.31 (2H, m), 3.48 (4H, m), 3.49-3.51 (6H, t, $J = 9.00$ Hz), 3.53-3.56 (6H, dd, $J = 10.00, 3.00$ Hz), 3.80-3.85 (18H, m), 3.88-3.93 (6H, t, $J = 9$ Hz), 4.96-4.97 (6H, d, $J = 3$ Hz) |
| [BMIm]Cl- $\beta$ -CD<br>(1:1 molar ratio, 300 MHz, Solv: D <sub>2</sub> O)<br>$\delta$ /ppm                                                                                                                                                                                                                                   | [BMP]Cl- $\beta$ -CD<br>(1:1 molar ratio, 300 MHz, Solv: D <sub>2</sub> O)<br>$\delta$ /ppm                                                                                                                                                                                                       |
| 0.85-0.90 (3H, t, $J = 7.26$ Hz), 1.23-1.30 (2H, m), 1.75-1.82 (2H, m), 3.49-3.54 (6H, t, $J = 9.2$ Hz), 3.57-3.60 (6H, dd, $J = 9.6, 3.2$ Hz), 3.72-3.80 (18H, m), 3.81-3.84 (6H, t, $J = 9.2$ Hz), 3.85 (3H, s), 4.12-4.17 (2H, t, $J = 7.11$ Hz), 5.00-5.01 (6H, d, $J = 3.6$ Hz), 7.40 (1H, s), 7.45 (1H, s), 8.69 (1H, s) | 0.89-0.94 (3H, t, $J = 7.29$ Hz), 1.32-1.40 (2H, m), 1.72-1.79 (2H, m), 2.19 (4H, m), 3.03 (3H, s), 3.27-3.34 (2H, m), 3.48 (4H, m), 3.49-3.51 (6H, t, $J = 9.00$ Hz), 3.53-3.56 (6H, dd, $J = 10.00, 3.00$ Hz), 3.82-3.87 (18H, m), 3.89-3.95 (6H, t, $J = 9$ Hz), 4.96-4.97 (6H, d, $J = 3$ Hz) |

**Table S2. Experimental values of density ( $\rho$ ), viscosity ( $\eta$ ) and refractive index ( $n_D$ ) of different mass fractions of aqueous  $\alpha$  and  $\beta$ -cyclodextrin mixtures at 298.15 K<sup>a</sup>**

| Aqueous solvent mixture | $\rho \times 10^{-3}$ /kg·m <sup>-3</sup> | $\eta$ /mP·s | $n_D$  |
|-------------------------|-------------------------------------------|--------------|--------|
| aq. $\alpha$ -CD        |                                           |              |        |
| $w_1 = 0.001$           | 0.99735                                   | 1.29         | 1.3329 |
| $w_1 = 0.003$           | 0.99802                                   | 1.30         | 1.3332 |
| $w_1 = 0.005$           | 0.99868                                   | 1.31         | 1.3335 |
| aq. $\beta$ -CD         |                                           |              |        |
| $w_2 = 0.001$           | 0.99755                                   | 1.30         | 1.3328 |
| $w_2 = 0.003$           | 0.99819                                   | 1.31         | 1.3331 |
| $w_2 = 0.005$           | 0.99895                                   | 1.32         | 1.3334 |

<sup>a</sup> Standard uncertainties  $u$  are:  $u(\rho) = 5 \times 10^{-5}$  g·cm<sup>-3</sup>,  $u(\eta) = 0.003$  mP·s,  $u(n_D) = 0.0002$ , and  $u(T) = \pm 0.01$  K.

**Table S3. Experimental values of density ( $\rho$ ), viscosity ( $\eta$ ) and refractive index ( $n_D$ ) of selected ionic liquids in different mass fractions of aqueous  $\alpha$  and  $\beta$ -cyclodextrin mixtures at 298.15 K<sup>a</sup>**

| molality<br>/mol·kg <sup>-1</sup> | $\rho \times 10^{-3}$<br>/kg·m <sup>-3</sup> | $\eta$<br>/mP·s | $n_D$  | molality<br>/mol·kg <sup>-1</sup> | $\rho \times 10^{-3}$<br>/kg·m <sup>-3</sup> | $\eta$<br>/mP·s | $n_D$  |
|-----------------------------------|----------------------------------------------|-----------------|--------|-----------------------------------|----------------------------------------------|-----------------|--------|
| [BMIm]Cl                          |                                              |                 |        |                                   |                                              |                 |        |
| $w_1 = 0.001^b$                   |                                              |                 |        | $w_2 = 0.001^b$                   |                                              |                 |        |
| 0.010034                          | 0.99836                                      | 1.36            | 1.3330 | 0.010032                          | 0.99858                                      | 1.38            | 1.3330 |
| 0.025113                          | 0.99988                                      | 1.41            | 1.3331 | 0.025106                          | 1.00014                                      | 1.43            | 1.3331 |
| 0.040225                          | 1.00140                                      | 1.44            | 1.3332 | 0.040212                          | 1.00171                                      | 1.47            | 1.3333 |
| 0.055370                          | 1.00293                                      | 1.47            | 1.3333 | 0.055350                          | 1.00329                                      | 1.49            | 1.3334 |
| 0.070548                          | 1.00446                                      | 1.50            | 1.3334 | 0.070518                          | 1.00488                                      | 1.53            | 1.3336 |
| 0.085760                          | 1.00599                                      | 1.52            | 1.3335 | 0.085717                          | 1.00648                                      | 1.56            | 1.3338 |
| $w_1 = 0.003^b$                   |                                              |                 |        | $w_2 = 0.003^b$                   |                                              |                 |        |
| 0.010027                          | 0.99901                                      | 1.39            | 1.3334 | 0.010025                          | 0.99924                                      | 1.40            | 1.3334 |
| 0.025096                          | 1.00053                                      | 1.45            | 1.3335 | 0.025088                          | 1.00087                                      | 1.46            | 1.3335 |
| 0.040198                          | 1.00207                                      | 1.49            | 1.3336 | 0.040178                          | 1.00255                                      | 1.50            | 1.3337 |
| 0.055332                          | 1.00361                                      | 1.54            | 1.3337 | 0.055295                          | 1.00428                                      | 1.54            | 1.3339 |
| 0.070497                          | 1.00517                                      | 1.56            | 1.3338 | 0.070432                          | 1.00610                                      | 1.57            | 1.3341 |
| 0.085695                          | 1.00674                                      | 1.59            | 1.3339 | 0.085595                          | 1.00789                                      | 1.60            | 1.3343 |
| $w_1 = 0.005^b$                   |                                              |                 |        | $w_2 = 0.005^b$                   |                                              |                 |        |
| 0.010021                          | 0.99962                                      | 1.41            | 1.3339 | 0.010018                          | 0.99999                                      | 1.42            | 1.3336 |
| 0.025083                          | 1.00105                                      | 1.48            | 1.3340 | 0.025066                          | 1.00173                                      | 1.49            | 1.3337 |
| 0.040181                          | 1.00249                                      | 1.53            | 1.3341 | 0.040138                          | 1.00355                                      | 1.54            | 1.3338 |
| 0.055311                          | 1.00398                                      | 1.57            | 1.3342 | 0.055227                          | 1.00549                                      | 1.57            | 1.3340 |
| 0.070475                          | 1.00548                                      | 1.60            | 1.3343 | 0.070333                          | 1.00749                                      | 1.61            | 1.3342 |
| 0.085671                          | 1.00702                                      | 1.64            | 1.3344 | 0.085459                          | 1.00948                                      | 1.65            | 1.3343 |
| [BMP]Cl                           |                                              |                 |        |                                   |                                              |                 |        |
| $w_1 = 0.001^b$                   |                                              |                 |        | $w_2 = 0.001^b$                   |                                              |                 |        |
| 0.010035                          | 0.99832                                      | 1.37            | 1.3347 | 0.010032                          | 0.99855                                      | 1.39            | 1.3345 |
| 0.025116                          | 0.99983                                      | 1.42            | 1.3348 | 0.025110                          | 1.00008                                      | 1.45            | 1.3346 |
| 0.040233                          | 1.00130                                      | 1.46            | 1.3349 | 0.040220                          | 1.00163                                      | 1.49            | 1.3347 |
| 0.055383                          | 1.00282                                      | 1.50            | 1.3350 | 0.055364                          | 1.00320                                      | 1.53            | 1.3348 |
| 0.070570                          | 1.00433                                      | 1.52            | 1.3351 | 0.070540                          | 1.00479                                      | 1.56            | 1.3349 |
| 0.085792                          | 1.00583                                      | 1.55            | 1.3352 | 0.085746                          | 1.00641                                      | 1.59            | 1.3350 |
| $w_1 = 0.003^b$                   |                                              |                 |        | $w_2 = 0.003^b$                   |                                              |                 |        |

|                 |         |      |        |                 |         |      |        |
|-----------------|---------|------|--------|-----------------|---------|------|--------|
| 0.010028        | 0.99894 | 1.39 | 1.3352 | 0.010025        | 0.99924 | 1.41 | 1.3346 |
| 0.025103        | 1.00034 | 1.45 | 1.3353 | 0.025088        | 1.00092 | 1.47 | 1.3347 |
| 0.040215        | 1.00175 | 1.50 | 1.3354 | 0.040178        | 1.00269 | 1.52 | 1.3348 |
| 0.055363        | 1.00318 | 1.53 | 1.3355 | 0.055285        | 1.00461 | 1.55 | 1.3349 |
| 0.070550        | 1.00461 | 1.56 | 1.3356 | 0.070408        | 1.00665 | 1.60 | 1.3350 |
| 0.085770        | 1.00608 | 1.60 | 1.3357 | 0.085544        | 1.00875 | 1.63 | 1.3352 |
| $w_1 = 0.005^b$ |         |      |        | $w_2 = 0.005^b$ |         |      |        |
| 0.010022        | 0.99955 | 1.41 | 1.3357 | 0.010018        | 0.99993 | 1.43 | 1.3350 |
| 0.025089        | 1.00087 | 1.47 | 1.3358 | 0.025072        | 1.00157 | 1.50 | 1.3351 |
| 0.040196        | 1.00221 | 1.52 | 1.3359 | 0.040151        | 1.00332 | 1.55 | 1.3352 |
| 0.055342        | 1.00357 | 1.55 | 1.3360 | 0.055252        | 1.00518 | 1.60 | 1.3353 |
| 0.070526        | 1.00494 | 1.60 | 1.3361 | 0.070372        | 1.00711 | 1.64 | 1.3354 |
| 0.085747        | 1.00635 | 1.64 | 1.3362 | 0.085500        | 1.00921 | 1.67 | 1.3355 |

<sup>a</sup> Standard uncertainties  $u$  are:  $u(\rho) = 5 \times 10^{-5} \text{ kg} \cdot \text{m}^{-3}$ ,  $u(\eta) = 0.003 \text{ mP} \cdot \text{s}$ ,  $u(n_D) = 0.0002$ ,  $u(\text{pH}) = 0.01$  and  $u(T) = 0.01 \text{ K}$ .

<sup>b</sup>  $w_1$  and  $w_2$  are mass fractions of  $\alpha$  and  $\beta$ -cyclodextrin in aqueous mixture respectively.

**Table S4. Data for surface tension and conductivity study of aqueous [BMIm]Cl- $\alpha$ -CD system at 298.15K<sup>a</sup>**

| Volm of $\alpha$ -CD (mL) | Total volm (mL) | Conc of [BMIm]Cl (mM) | Conc of $\alpha$ -CD (mM) | Surface tension (mN m <sup>-1</sup> ) | Conductivity (mS m <sup>-1</sup> ) |
|---------------------------|-----------------|-----------------------|---------------------------|---------------------------------------|------------------------------------|
| 0                         | 10              | 10.000                | 0.000                     | 42.0                                  | 4.52                               |
| 1                         | 11              | 9.091                 | 0.909                     | 45.9                                  | 4.14                               |
| 2                         | 12              | 8.333                 | 1.667                     | 49.8                                  | 3.85                               |
| 3                         | 13              | 7.692                 | 2.308                     | 53.3                                  | 3.57                               |
| 4                         | 14              | 7.143                 | 2.857                     | 56.3                                  | 3.36                               |
| 5                         | 15              | 6.667                 | 3.333                     | 58.8                                  | 3.18                               |
| 6                         | 16              | 6.250                 | 3.750                     | 61.1                                  | 2.98                               |
| 7                         | 17              | 5.882                 | 4.118                     | 63.3                                  | 2.84                               |
| 8                         | 18              | 5.556                 | 4.444                     | 64.9                                  | 2.70                               |
| 9                         | 19              | 5.263                 | 4.737                     | 66.8                                  | 2.57                               |
| 10                        | 20              | 5.000                 | 5.000                     | 68.7                                  | 2.42                               |

|    |    |       |       |      |      |
|----|----|-------|-------|------|------|
| 11 | 21 | 4.762 | 5.238 | 69.0 | 2.39 |
| 12 | 22 | 4.545 | 5.455 | 69.2 | 2.36 |
| 13 | 23 | 4.348 | 5.652 | 69.3 | 2.34 |
| 14 | 24 | 4.167 | 5.833 | 69.4 | 2.32 |
| 15 | 25 | 4.000 | 6.000 | 69.5 | 2.30 |
| 16 | 26 | 3.846 | 6.154 | 69.6 | 2.28 |
| 17 | 27 | 3.704 | 6.296 | 69.7 | 2.26 |
| 18 | 28 | 3.571 | 6.429 | 69.8 | 2.24 |
| 19 | 29 | 3.448 | 6.552 | 69.9 | 2.22 |
| 20 | 30 | 3.333 | 6.667 | 70.0 | 2.20 |

<sup>a</sup> Standard uncertainties in temperature  $u$  are:  $u(T) = \pm 0.01$  K.

**Table S5. Data for surface tension and conductivity of aqueous [BMIm]Cl- $\beta$ -CD system at 298.15K<sup>a</sup>**

| Volm of $\beta$ -CD (mL) | Total volm (mL) | Conc of [BMIm]Cl (mM) | Conc of $\beta$ -CD (mM) | Surface tension (mN m <sup>-1</sup> ) | Conductivity (mS m <sup>-1</sup> ) |
|--------------------------|-----------------|-----------------------|--------------------------|---------------------------------------|------------------------------------|
| 0                        | 10              | 10.000                | 0.000                    | 42.0                                  | 4.58                               |
| 1                        | 11              | 9.091                 | 0.909                    | 46.3                                  | 4.21                               |
| 2                        | 12              | 8.333                 | 1.667                    | 50.3                                  | 3.93                               |
| 3                        | 13              | 7.692                 | 2.308                    | 53.5                                  | 3.70                               |
| 4                        | 14              | 7.143                 | 2.857                    | 56.6                                  | 3.48                               |
| 5                        | 15              | 6.667                 | 3.333                    | 58.9                                  | 3.29                               |
| 6                        | 16              | 6.250                 | 3.750                    | 61.2                                  | 3.13                               |
| 7                        | 17              | 5.882                 | 4.118                    | 63.0                                  | 2.99                               |
| 8                        | 18              | 5.556                 | 4.444                    | 64.7                                  | 2.86                               |
| 9                        | 19              | 5.263                 | 4.737                    | 66.5                                  | 2.75                               |
| 10                       | 20              | 5.000                 | 5.000                    | 68.1                                  | 2.62                               |
| 11                       | 21              | 4.762                 | 5.238                    | 68.4                                  | 2.59                               |

|    |    |       |       |      |      |
|----|----|-------|-------|------|------|
| 12 | 22 | 4.545 | 5.455 | 68.8 | 2.56 |
| 13 | 23 | 4.348 | 5.652 | 69.2 | 2.54 |
| 14 | 24 | 4.167 | 5.833 | 69.5 | 2.52 |
| 15 | 25 | 4.000 | 6.000 | 69.7 | 2.50 |
| 16 | 26 | 3.846 | 6.154 | 69.9 | 2.48 |
| 17 | 27 | 3.704 | 6.296 | 70.1 | 2.46 |
| 18 | 28 | 3.571 | 6.429 | 70.3 | 2.44 |
| 19 | 29 | 3.448 | 6.552 | 70.5 | 2.42 |
| 20 | 30 | 3.333 | 6.667 | 70.7 | 2.40 |

<sup>a</sup> Standard uncertainties in temperature  $u$  are:  $u(T) = \pm 0.01$  K.

**Table S6. Data for surface tension and conductivity study of aqueous [BMP]Cl- $\alpha$ -CD system at 298.15K<sup>a</sup>**

| Volm of $\alpha$ -CD (mL) | Total volm (mL) | Conc of [BMP]Cl (mM) | Conc of $\alpha$ -CD (mM) | Surface tension (mN m <sup>-1</sup> ) | Conductivity (mS m <sup>-1</sup> ) |
|---------------------------|-----------------|----------------------|---------------------------|---------------------------------------|------------------------------------|
| 0                         | 10              | 10.000               | 0.000                     | 39.0                                  | 5.00                               |
| 1                         | 11              | 9.091                | 0.909                     | 42.9                                  | 4.59                               |
| 2                         | 12              | 8.333                | 1.667                     | 47.2                                  | 4.25                               |
| 3                         | 13              | 7.692                | 2.308                     | 50.9                                  | 3.99                               |
| 4                         | 14              | 7.143                | 2.857                     | 54.0                                  | 3.76                               |
| 5                         | 15              | 6.667                | 3.333                     | 56.8                                  | 3.55                               |
| 6                         | 16              | 6.250                | 3.750                     | 59.4                                  | 3.38                               |
| 7                         | 17              | 5.882                | 4.118                     | 61.6                                  | 3.21                               |
| 8                         | 18              | 5.556                | 4.444                     | 63.7                                  | 3.08                               |
| 9                         | 19              | 5.263                | 4.737                     | 65.7                                  | 2.95                               |
| 10                        | 20              | 5.000                | 5.000                     | 67.6                                  | 2.80                               |
| 11                        | 21              | 4.762                | 5.238                     | 67.8                                  | 2.77                               |
| 12                        | 22              | 4.545                | 5.455                     | 68.0                                  | 2.74                               |



|    |    |       |       |      |      |
|----|----|-------|-------|------|------|
| 13 | 23 | 4.348 | 5.652 | 68.2 | 2.71 |
| 14 | 24 | 4.167 | 5.833 | 68.4 | 2.68 |
| 15 | 25 | 4.000 | 6.000 | 68.5 | 2.65 |
| 16 | 26 | 3.846 | 6.154 | 68.6 | 2.62 |
| 17 | 27 | 3.704 | 6.296 | 68.7 | 2.59 |
| 18 | 28 | 3.571 | 6.429 | 68.8 | 2.56 |
| 19 | 29 | 3.448 | 6.552 | 68.9 | 2.53 |
| 20 | 30 | 3.333 | 6.667 | 69.0 | 2.50 |

<sup>a</sup> Standard uncertainties in temperature  $u$  are:  $u(T) = \pm 0.01$  K.

**Table S7. Data for surface tension and conductivity study of aqueous [BMP]Cl- $\beta$ -CD system at 298.15K<sup>a</sup>**

| Volm of $\beta$ -CD (mL) | Total volm (mL) | Conc of [BMP]Cl (mM) | Conc of $\beta$ -CD (mM) | Surface tension (mN m <sup>-1</sup> ) | Conductivity (mS m <sup>-1</sup> ) |
|--------------------------|-----------------|----------------------|--------------------------|---------------------------------------|------------------------------------|
| 0                        | 10              | 10.000               | 0.000                    | 39.0                                  | 5.21                               |
| 1                        | 11              | 9.091                | 0.909                    | 43.2                                  | 4.82                               |
| 2                        | 12              | 8.333                | 1.667                    | 47.5                                  | 4.47                               |
| 3                        | 13              | 7.692                | 2.308                    | 51.0                                  | 4.21                               |
| 4                        | 14              | 7.143                | 2.857                    | 53.9                                  | 3.95                               |
| 5                        | 15              | 6.667                | 3.333                    | 56.7                                  | 3.73                               |
| 6                        | 16              | 6.250                | 3.750                    | 59.1                                  | 3.53                               |
| 7                        | 17              | 5.882                | 4.118                    | 61.3                                  | 3.37                               |
| 8                        | 18              | 5.556                | 4.444                    | 63.3                                  | 3.22                               |
| 9                        | 19              | 5.263                | 4.737                    | 65.0                                  | 3.09                               |
| 10                       | 20              | 5.000                | 5.000                    | 66.9                                  | 2.98                               |
| 11                       | 21              | 4.762                | 5.238                    | 67.4                                  | 2.94                               |
| 12                       | 22              | 4.545                | 5.455                    | 67.8                                  | 2.90                               |
| 13                       | 23              | 4.348                | 5.652                    | 68.1                                  | 2.87                               |

|    |    |       |       |      |      |
|----|----|-------|-------|------|------|
| 14 | 24 | 4.167 | 5.833 | 68.4 | 2.84 |
| 15 | 25 | 4.000 | 6.000 | 68.7 | 2.81 |
| 16 | 26 | 3.846 | 6.154 | 69.0 | 2.79 |
| 17 | 27 | 3.704 | 6.296 | 69.3 | 2.77 |
| 18 | 28 | 3.571 | 6.429 | 69.6 | 2.75 |
| 19 | 29 | 3.448 | 6.552 | 69.8 | 2.73 |
| 20 | 30 | 3.333 | 6.667 | 70.0 | 2.71 |

<sup>a</sup> Standard uncertainties in temperature  $u$  are:  $u(T) = \pm 0.01$  K.

**Table S8. Apparent molar volume ( $\phi_V$ ),  $(\eta_r-1)/\sqrt{m}$  and molar refraction ( $R_M$ ) of selected ionic liquids in different mass fractions of aqueous  $\alpha$  and  $\beta$ -cyclodextrin mixtures at 298.15 K<sup>a</sup>**

| molality<br>/mol·kg <sup>-1</sup> | $\phi_V \times 10^6$<br>/ m <sup>3</sup> mol <sup>-1</sup> | $(\eta_r-1)/\sqrt{m}$<br>/kg <sup>1/2</sup> mol <sup>-1/2</sup> | $R_M \times 10^6$<br>/m <sup>3</sup> mol <sup>-1</sup> | molality<br>/mol·kg <sup>-1</sup> | $\phi_V \times 10^6$<br>/ m <sup>3</sup> mol <sup>-1</sup> | $(\eta_r-1)/\sqrt{m}$<br>/kg <sup>1/2</sup> mol <sup>-1/2</sup> | $R_M \times 10^6$<br>/m <sup>3</sup> mol <sup>-1</sup> |
|-----------------------------------|------------------------------------------------------------|-----------------------------------------------------------------|--------------------------------------------------------|-----------------------------------|------------------------------------------------------------|-----------------------------------------------------------------|--------------------------------------------------------|
| [BMIm]Cl                          |                                                            |                                                                 |                                                        |                                   |                                                            |                                                                 |                                                        |
| $w_1 = 0.001^b$                   |                                                            |                                                                 |                                                        | $w_2 = 0.001^b$                   |                                                            |                                                                 |                                                        |
| 0.010034                          | 73.87                                                      | 0.542                                                           | 35.9878                                                | 0.010032                          | 71.85                                                      | 0.614                                                           | 35.9799                                                |
| 0.025113                          | 73.67                                                      | 0.587                                                           | 35.9429                                                | 0.025106                          | 71.24                                                      | 0.631                                                           | 35.9336                                                |
| 0.040225                          | 73.62                                                      | 0.580                                                           | 35.8982                                                | 0.040212                          | 70.84                                                      | 0.652                                                           | 35.8968                                                |
| 0.055370                          | 73.41                                                      | 0.593                                                           | 35.8532                                                | 0.055350                          | 70.48                                                      | 0.621                                                           | 35.8501                                                |
| 0.070548                          | 73.29                                                      | 0.613                                                           | 35.8083                                                | 0.070518                          | 70.13                                                      | 0.666                                                           | 35.8128                                                |
| 0.085760                          | 73.22                                                      | 0.609                                                           | 35.7636                                                | 0.085717                          | 69.78                                                      | 0.683                                                           | 35.7753                                                |
| $w_1 = 0.003^b$                   |                                                            |                                                                 |                                                        | $w_2 = 0.003^b$                   |                                                            |                                                                 |                                                        |
| 0.010027                          | 75.82                                                      | 0.691                                                           | 36.0036                                                | 0.010025                          | 69.80                                                      | 0.686                                                           | 35.9954                                                |
| 0.025096                          | 74.42                                                      | 0.728                                                           | 35.9587                                                | 0.025088                          | 67.59                                                      | 0.723                                                           | 35.9465                                                |
| 0.040198                          | 73.57                                                      | 0.729                                                           | 35.9132                                                | 0.040178                          | 65.79                                                      | 0.724                                                           | 35.9058                                                |
| 0.055332                          | 73.18                                                      | 0.785                                                           | 35.8679                                                | 0.055295                          | 64.06                                                      | 0.747                                                           | 35.8634                                                |
| 0.070497                          | 72.67                                                      | 0.753                                                           | 35.8220                                                | 0.070432                          | 61.78                                                      | 0.748                                                           | 35.8180                                                |
| 0.085695                          | 72.22                                                      | 0.762                                                           | 35.7758                                                | 0.085595                          | 60.66                                                      | 0.757                                                           | 35.7738                                                |
| $w_1 = 0.005^b$                   |                                                            |                                                                 |                                                        | $w_2 = 0.005^b$                   |                                                            |                                                                 |                                                        |
| 0.010021                          | 80.78                                                      | 0.763                                                           | 36.0306                                                | 0.010018                          | 70.74                                                      | 0.757                                                           | 35.9879                                                |
| 0.025083                          | 79.98                                                      | 0.819                                                           | 35.9889                                                | 0.025066                          | 63.54                                                      | 0.813                                                           | 35.9352                                                |
| 0.040181                          | 79.52                                                      | 0.838                                                           | 35.9470                                                | 0.040138                          | 59.73                                                      | 0.832                                                           | 35.8798                                                |
| 0.055311                          | 78.41                                                      | 0.844                                                           | 35.9034                                                | 0.055227                          | 55.82                                                      | 0.806                                                           | 35.8300                                                |
| 0.070475                          | 77.63                                                      | 0.834                                                           | 35.8596                                                | 0.070333                          | 52.73                                                      | 0.828                                                           | 35.7783                                                |
| 0.085671                          | 76.65                                                      | 0.861                                                           | 35.8145                                                | 0.085459                          | 50.84                                                      | 0.855                                                           | 35.7175                                                |
| [BMP]Cl                           |                                                            |                                                                 |                                                        |                                   |                                                            |                                                                 |                                                        |
| $w_1 = 0.001^b$                   |                                                            |                                                                 |                                                        | $w_2 = 0.001^b$                   |                                                            |                                                                 |                                                        |
| 0.010035                          | 80.38                                                      | 0.619                                                           | 36.6735                                                | 0.010032                          | 77.90                                                      | 0.691                                                           | 36.6451                                                |

|                 |       |       |         |                 |       |       |         |
|-----------------|-------|-------|---------|-----------------|-------|-------|---------|
| 0.025116        | 78.18 | 0.636 | 36.6280 | 0.025110        | 76.70 | 0.728 | 36.5990 |
| 0.040233        | 78.63 | 0.657 | 36.5841 | 0.040220        | 75.90 | 0.729 | 36.5523 |
| 0.055383        | 77.92 | 0.692 | 36.5386 | 0.055364        | 75.17 | 0.752 | 36.5049 |
| 0.070570        | 77.66 | 0.671 | 36.4935 | 0.070540        | 74.46 | 0.753 | 36.4571 |
| 0.085792        | 77.61 | 0.688 | 36.4489 | 0.085746        | 73.66 | 0.762 | 36.4082 |
| $w_1 = 0.003^b$ |       |       |         | $w_2 = 0.003^b$ |       |       |         |
| 0.010028        | 85.34 | 0.691 | 36.7003 | 0.010025        | 72.84 | 0.762 | 36.6298 |
| 0.025103        | 84.54 | 0.728 | 36.6589 | 0.025088        | 68.63 | 0.771 | 36.5782 |
| 0.040215        | 84.09 | 0.767 | 36.6172 | 0.040178        | 65.33 | 0.800 | 36.5235 |
| 0.055363        | 83.52 | 0.752 | 36.5749 | 0.055285        | 61.09 | 0.779 | 36.4636 |
| 0.070550        | 83.19 | 0.753 | 36.5327 | 0.070408        | 56.96 | 0.834 | 36.3996 |
| 0.085770        | 82.51 | 0.788 | 36.4892 | 0.085544        | 53.57 | 0.835 | 36.3434 |
| $w_1 = 0.005^b$ |       |       |         | $w_2 = 0.005^b$ |       |       |         |
| 0.010022        | 90.29 | 0.763 | 36.7276 | 0.010018        | 79.25 | 0.833 | 36.6442 |
| 0.025089        | 89.69 | 0.771 | 36.6890 | 0.025072        | 72.45 | 0.861 | 36.5941 |
| 0.040196        | 89.04 | 0.800 | 36.6499 | 0.040151        | 67.99 | 0.870 | 36.5401 |
| 0.055342        | 88.38 | 0.779 | 36.6101 | 0.055252        | 63.96 | 0.902 | 36.4824 |
| 0.070526        | 87.86 | 0.834 | 36.5700 | 0.070372        | 60.66 | 0.914 | 36.4223 |
| 0.085747        | 87.05 | 0.860 | 36.5286 | 0.085500        | 56.52 | 0.907 | 36.3564 |

<sup>a</sup> Standard uncertainties  $u$  are:  $u(T) = 0.01\text{K}$ .

<sup>b</sup>  $w_1$  and  $w_2$  are mass fractions of  $\alpha$  and  $\beta$ -cyclodextrin in aqueous mixture respectively.

**Table S9. Limiting apparent molar volume ( $\phi_V^0$ ), experimental slope ( $S_V^*$ ), viscosity  $A$  and  $B$ -coefficient and limiting molar refraction ( $R_M^0$ ) of ionic liquids in different mass fractions of aqueous  $\alpha$  and  $\beta$ -cyclodextrin mixtures at 298.15 K<sup>a</sup>**

| Aq. solvent mixture | $\phi_V^0 \times 10^6$<br>/ $\text{m}^3 \text{mol}^{-1}$ | $S_V^* \times 10^6$<br>/ $\text{m}^3 \text{mol}^{-3/2} \text{kg}^{1/2}$ | $B$<br>/ $\text{kg mol}^{-1}$ | $A$<br>/ $\text{kg}^{1/2} \text{mol}^{-1/2}$ | $R_M^0 \times 10^6$<br>/ $\text{m}^3 \text{mol}^{-1}$ |
|---------------------|----------------------------------------------------------|-------------------------------------------------------------------------|-------------------------------|----------------------------------------------|-------------------------------------------------------|
| [BMIm]Cl            |                                                          |                                                                         |                               |                                              |                                                       |
| $w_1 = 0.001^b$     | 74.22                                                    | -3.423                                                                  | 0.332                         | 0.517                                        | 36.12                                                 |
| $w_1 = 0.003^b$     | 77.44                                                    | -18.18                                                                  | 0.384                         | 0.661                                        | 36.14                                                 |
| $w_1 = 0.005^b$     | 83.24                                                    | -21.15                                                                  | 0.431                         | 0.736                                        | 36.16                                                 |
| [BMP]Cl             |                                                          |                                                                         |                               |                                              |                                                       |
| $w_1 = 0.001^b$     | 81.08                                                    | -12.87                                                                  | 0.374                         | 0.582                                        | 36.80                                                 |
| $w_1 = 0.003^b$     | 86.8                                                     | -14.06                                                                  | 0.422                         | 0.658                                        | 36.82                                                 |
| $w_1 = 0.005^b$     | 92.17                                                    | -16.54                                                                  | 0.470                         | 0.702                                        | 36.84                                                 |
| [BMIm]Cl            |                                                          |                                                                         |                               |                                              |                                                       |
| $w_2 = 0.001^b$     | 72.93                                                    | -10.58                                                                  | 0.305                         | 0.581                                        | 36.10                                                 |
| $w_2 = 0.003^b$     | 75.06                                                    | -48.50                                                                  | 0.349                         | 0.657                                        | 36.12                                                 |
| $w_2 = 0.005^b$     | 80.6                                                     | -104                                                                    | 0.4                           | 0.731                                        | 36.14                                                 |
| [BMP]Cl             |                                                          |                                                                         |                               |                                              |                                                       |

|                 |       |        |       |       |       |
|-----------------|-------|--------|-------|-------|-------|
| $w_2 = 0.001^b$ | 80.12 | -21.54 | 0.349 | 0.662 | 36.78 |
| $w_2 = 0.003^b$ | 84.12 | -100.8 | 0.390 | 0.715 | 36.80 |
| $w_2 = 0.005^b$ | 90.95 | -115.7 | 0.432 | 0.79  | 36.82 |

<sup>a</sup> Standard uncertainties  $u$  are:  $u(T) = 0.01\text{K}$ .

<sup>b</sup>  $w_1$  and  $w_2$  are mass fractions of  $\alpha$  and  $\beta$ -cyclodextrin in aqueous mixture respectively.

**Table S10. Frequencies at FTIR spectra of [BMIm]Cl, [BMP]Cl,  $\alpha$ -CD,  $\beta$ -CD and solid inclusion complexes**

| [BMIm]Cl                       |                                                        | [BMP]Cl                        |                                                        |
|--------------------------------|--------------------------------------------------------|--------------------------------|--------------------------------------------------------|
| wave number / $\text{cm}^{-1}$ | group                                                  | wave number / $\text{cm}^{-1}$ | group                                                  |
| 3436.81                        | =C-H                                                   | 3409.96                        | -C-H from ring                                         |
| 2963.45                        | -C-H from $-\text{CH}_3$                               | 2970.44                        | -C-H from $-\text{CH}_3$                               |
| 1634.59                        | -C=N                                                   | 1465.54                        | bending of -C-H from $-\text{CH}_2$                    |
| 1574.80                        | C=C                                                    | 1400.30                        | bending of -C-H from $-\text{CH}_3$                    |
| 1464.89                        | bending $-\text{CH}_2$                                 | 1166.82                        | -C-N                                                   |
| 1400.30                        | bending $-\text{CH}_2$                                 |                                |                                                        |
| 1168.58                        | -C-N                                                   |                                |                                                        |
| $\alpha$ -Cyclodextrin         |                                                        | $\beta$ -Cyclodextrin          |                                                        |
| wave number / $\text{cm}^{-1}$ | group                                                  | wave number / $\text{cm}^{-1}$ | group                                                  |
| 3412.10                        | stretching of O-H                                      | 3349.84                        | stretching of O-H                                      |
| 2930.79                        | stretching of -C-H from $-\text{CH}_2$                 | 2921.52                        | stretching of -C-H from $-\text{CH}_2$                 |
| 1406.76                        | bending of -C-H from $-\text{CH}_2$ and bending of O-H | 1412.36                        | bending of -C-H from $-\text{CH}_2$ and bending of O-H |
| 1154.39                        | bending of C-O-C                                       | 1157.57                        | bending of C-O-C                                       |
| 1030.39                        | stretching of C-C-O skeletal                           | 1033.51                        | stretching of C-C-O skeletal                           |
| 952.36                         | vibration involving $\alpha$ -1,4linkage               | 938.53                         | vibration involving $\alpha$ -1,4linkage               |

| [BMIm]Cl- $\alpha$ -CD inclusion complex |                                                                          | [BMP]Cl- $\alpha$ -CD inclusion complex |                                                                          |
|------------------------------------------|--------------------------------------------------------------------------|-----------------------------------------|--------------------------------------------------------------------------|
| wave number / $\text{cm}^{-1}$           | group                                                                    | wave number / $\text{cm}^{-1}$          | group                                                                    |
| 3370.61                                  | stretching of O-H of $\alpha$ -CD                                        | 3362.56                                 | stretching of O-H of $\alpha$ -CD                                        |
| 2931.03                                  | stretching of -C-H from -CH <sub>2</sub> of $\alpha$ -CD                 | 2955.06                                 | stretching of -C-H from -CH <sub>2</sub> of $\alpha$ -CD                 |
| 1630.02                                  | stretching of -C=N                                                       | 1401.22                                 | bending of -C-H from -CH <sub>2</sub> and bending of O-H of $\alpha$ -CD |
| 1410.13                                  | bending of -C-H from -CH <sub>2</sub> and bending of O-H of $\alpha$ -CD | 1149.61                                 | bending of C-O-C $\alpha$ -CD                                            |
| 1150.07                                  | bending of C-O-C of $\alpha$ -CD                                         | 946.52                                  | skeletal vibration involving $\alpha$ -1,4linkage                        |
| 948.07                                   | skeletal vibration involving $\alpha$ -1,4linkage                        |                                         |                                                                          |
| [BMIm]Cl- $\beta$ -CD inclusion complex  |                                                                          | [BMP]Cl- $\beta$ -CD inclusion complex  |                                                                          |
| wave number / $\text{cm}^{-1}$           | group                                                                    | wave number / $\text{cm}^{-1}$          | group                                                                    |
| 3364.47                                  | stretching of O-H Of $\beta$ -CD                                         | 3369.85                                 | stretching of O-H of $\beta$ -CD                                         |
| 2932.46                                  | stretching of -C-H from -CH <sub>2</sub> Of $\beta$ -CD                  | 2931.03                                 | stretching of -C-H from -CH <sub>2</sub> Of $\beta$ -CD                  |
| 1407.57                                  | bending of -C-H from -CH <sub>2</sub> and bending of O-H of $\beta$ -CD  | 1408.47                                 | bending of -C-H from -CH <sub>2</sub> and bending of O-H Of $\beta$ -CD  |
| 1150.87                                  | bending of C-O-C of $\beta$ -CD                                          | 1150.31                                 | bending of C-O-C Of $\beta$ -CD                                          |
| 1039.00                                  | stretching of C-C-O of $\beta$ -CD                                       | 1030.00                                 | stretching of C-C-O Of $\beta$ -CD                                       |
| 944.27                                   | skeletal vibration involving $\alpha$ -1,4linkage of $\beta$ -CD         | 943.16                                  | skeletal vibration involving $\alpha$ -1,4linkage of $\beta$ -CD         |

Figures:

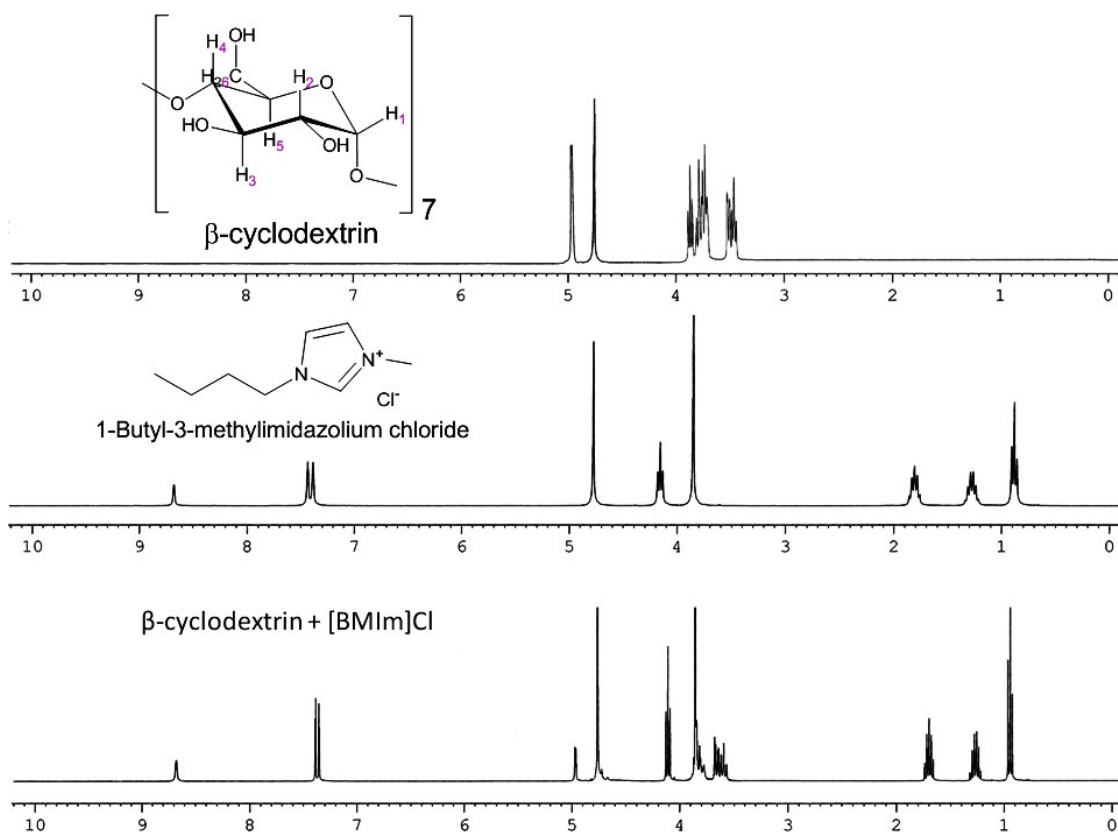

**Figure S1(a).** <sup>1</sup>H NMR Spectra of (a)β-CD (b) [BMIm]Cl (c) 1:1 molar ratio of β-CD and [BMIm]Cl in D<sub>2</sub>O in 298.15 K.

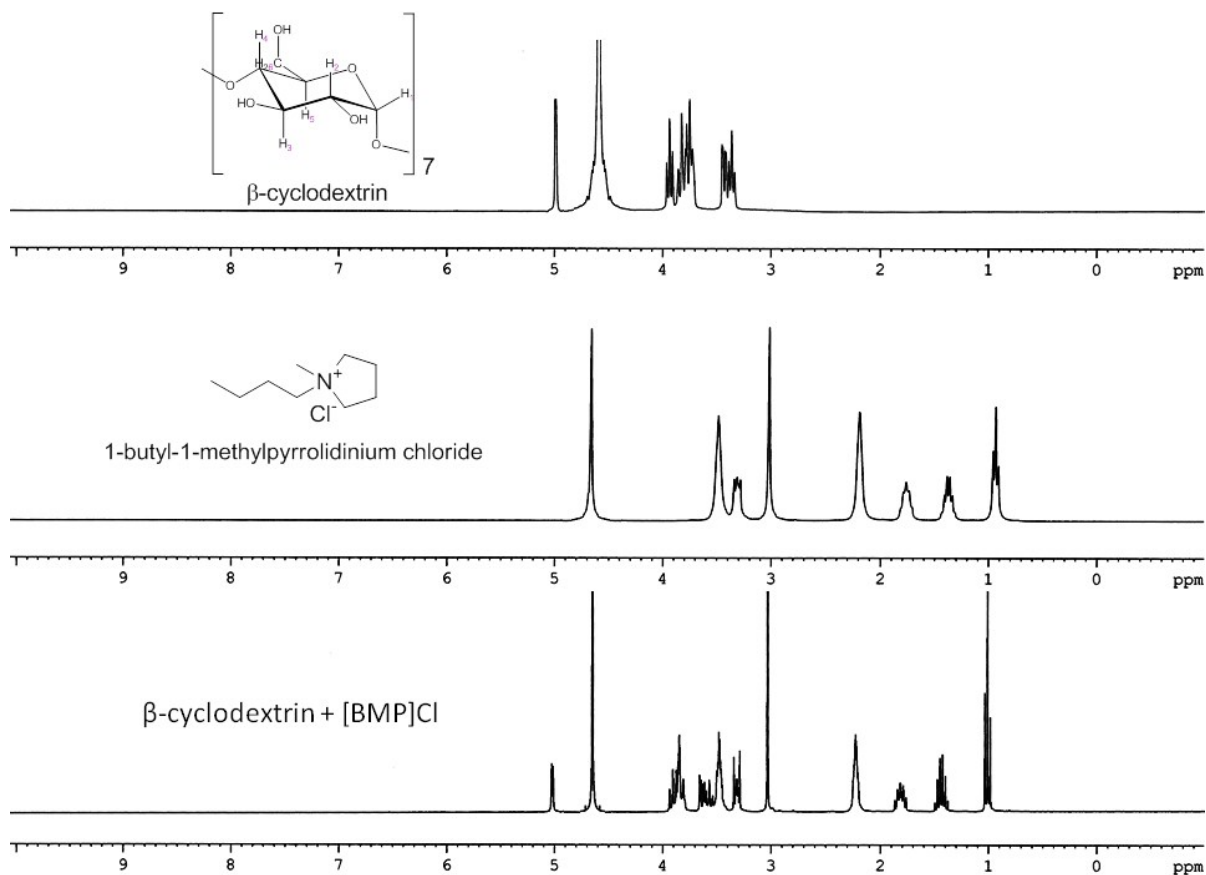

**Figure S1(b).**  $^1\text{H}$  NMR Spectra of (a)  $\beta$ -CD (b) [BMP]Cl (c) 1:1 molar ratio of  $\beta$ -CD and [BMP]Cl in  $\text{D}_2\text{O}$  in 298.15 K.

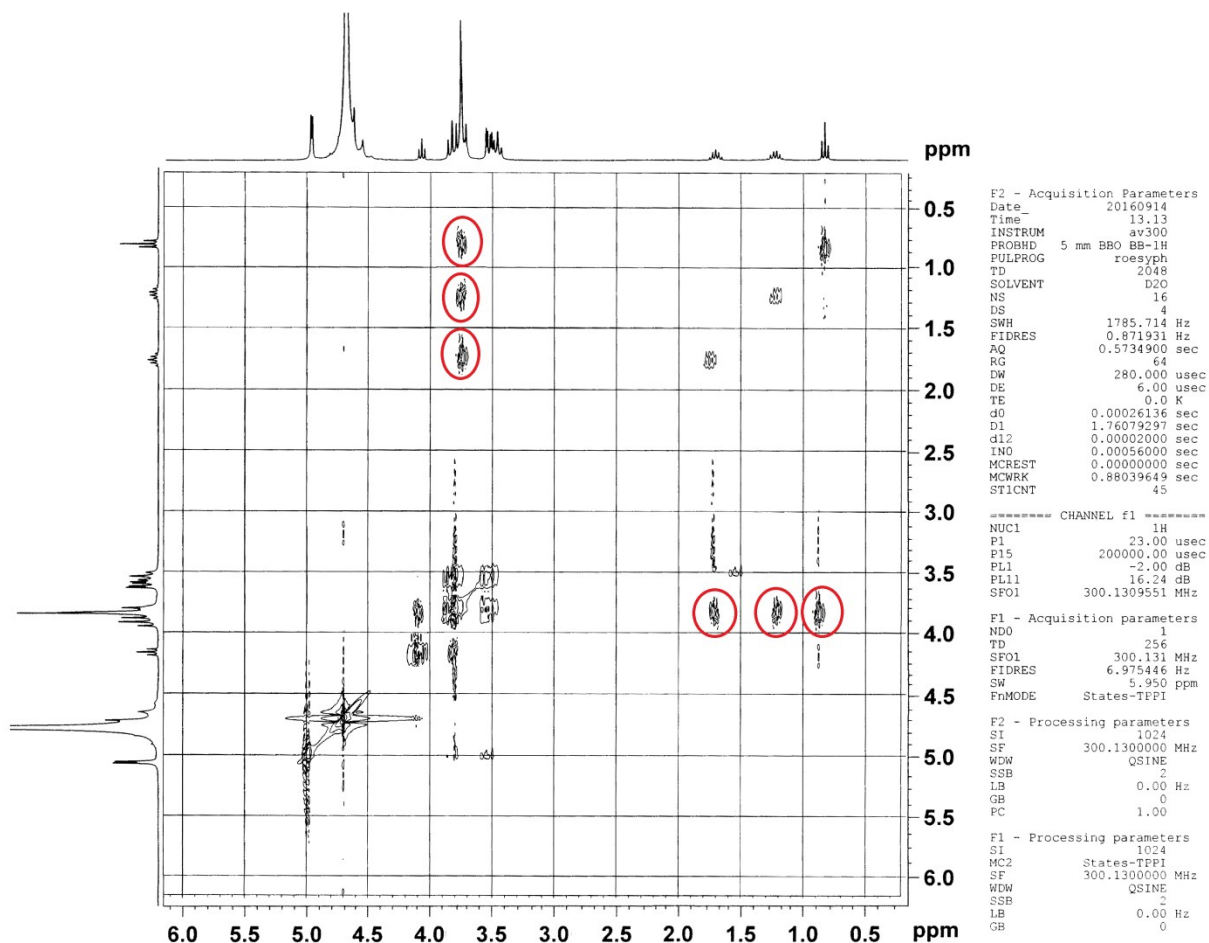

**Figure S2(a).** 2D ROESY spectra of solid inclusion complex of [BMIm]Cl and  $\beta$ -CD in  $D_2O$  (correlation signals are marked by red circles).



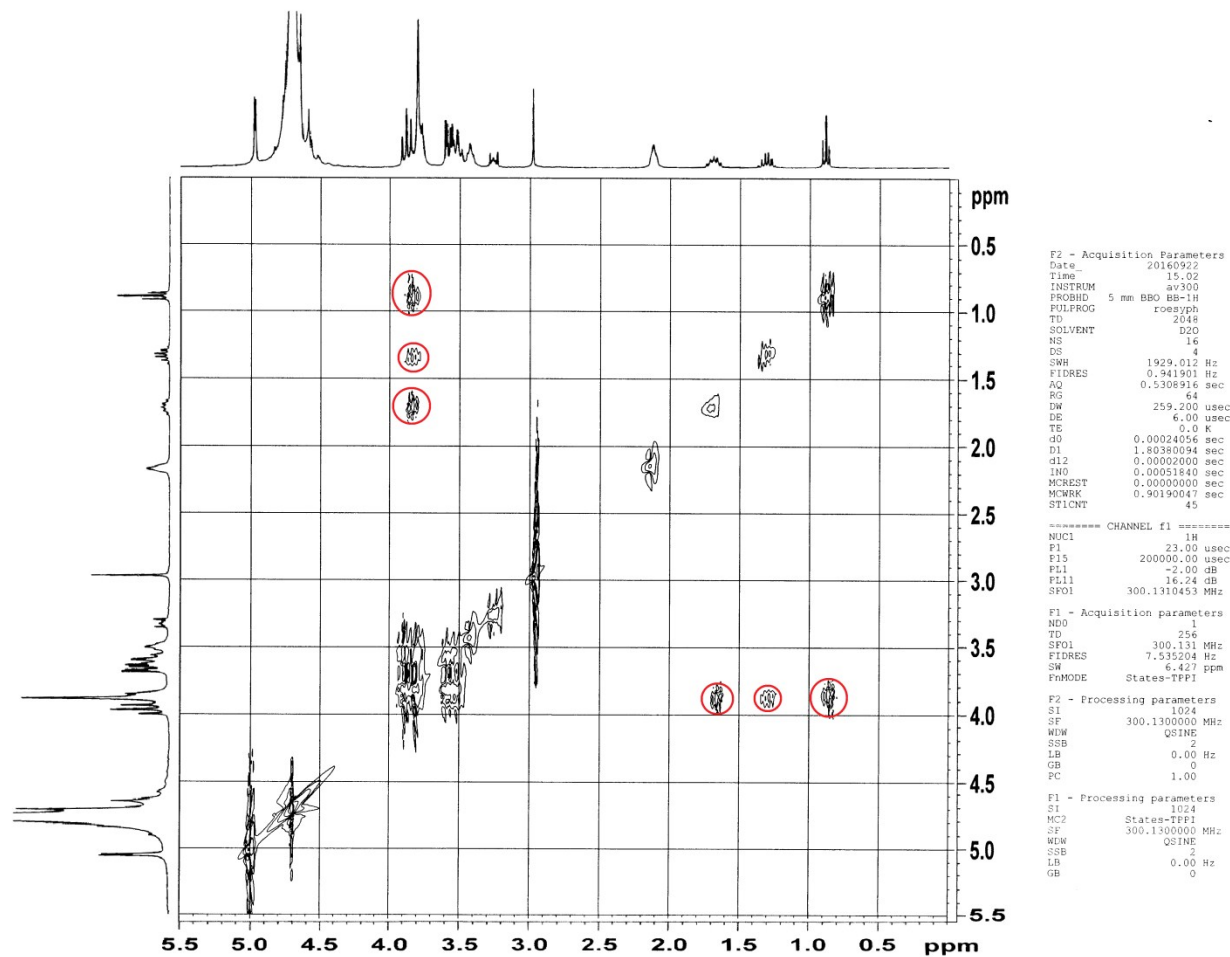

**Figure S2(b).** 2D ROESY spectra of solid inclusion complex of [BMP]Cl and  $\beta$ -CD in D<sub>2</sub>O (correlation signals are marked by red circles).

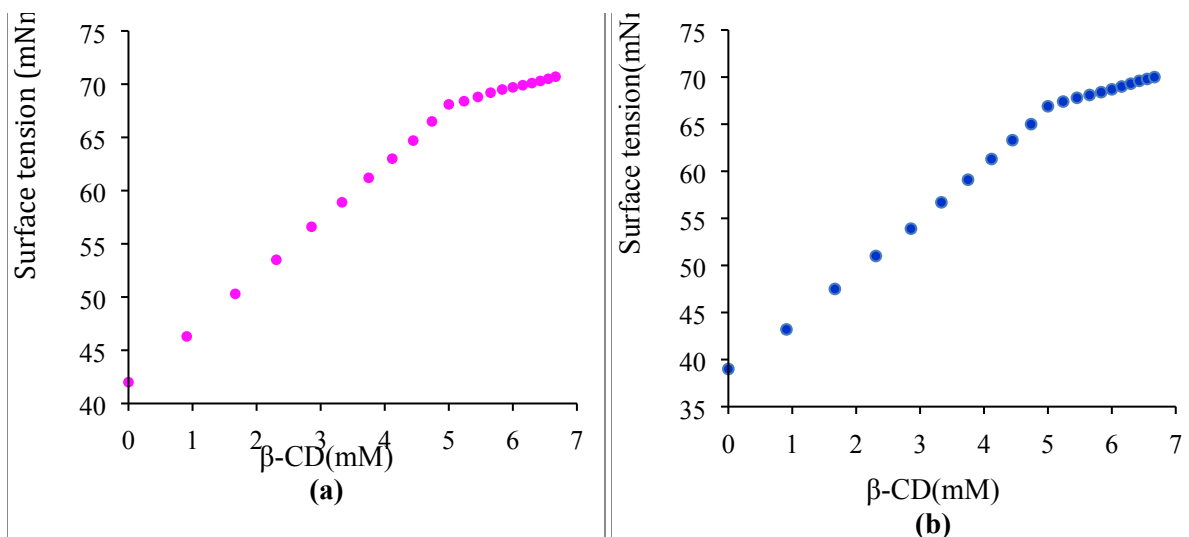

**Figure S3.** Variation of surface tension of aqueous (a) [BMIm]Cl- $\beta$ -CD and (b) [BMP]Cl- $\beta$ -CD systems respectively at 298.15 K.

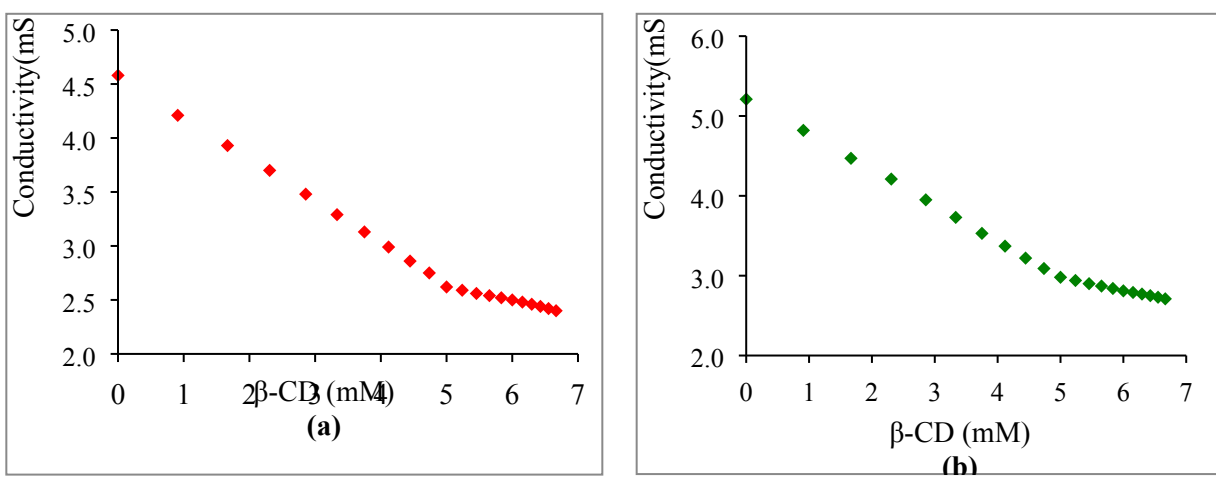

**Figure S4.** Variation of conductivity of aqueous (a) [BMIm]Cl- $\beta$ -CD and (b) [BMP]Cl- $\beta$ -CD systems respectively at 298.15 K.

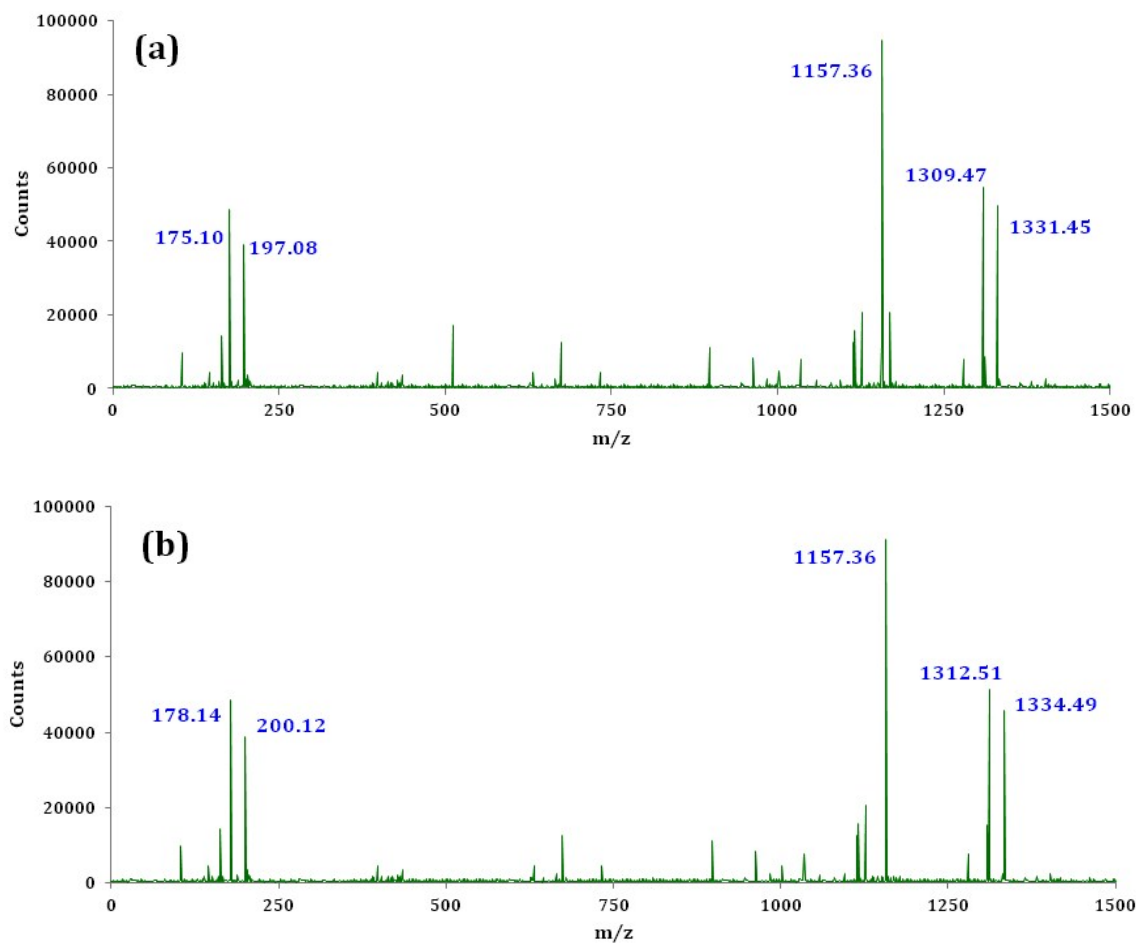

**Figure S5.** ESI mass spectra of (a) [BMIm]Cl- $\beta$ -CD inclusion complex and (b) [BMP]Cl- $\beta$ -CD inclusion complex.

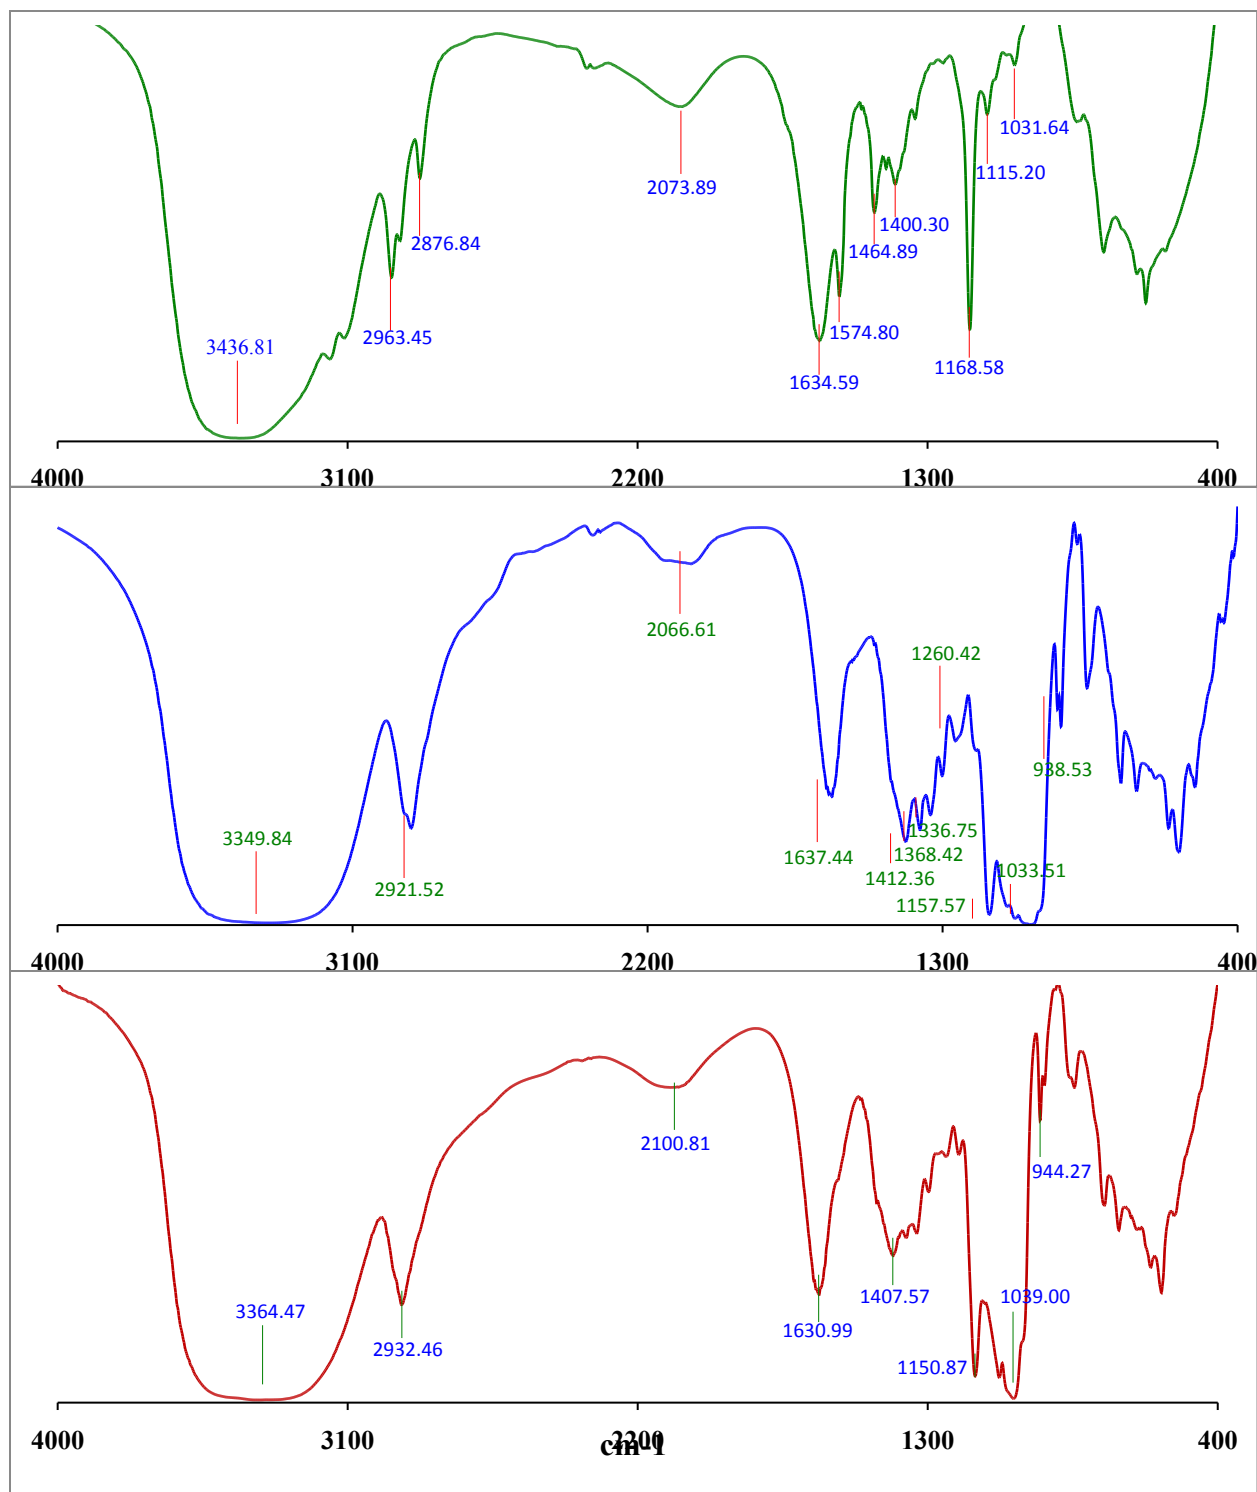

**Figure S6(a).** FTIR spectra of [BMIm]Cl (top),  $\beta$ -CD (middle) and [BMIm]Cl- $\beta$ -CD inclusion complex (bottom).

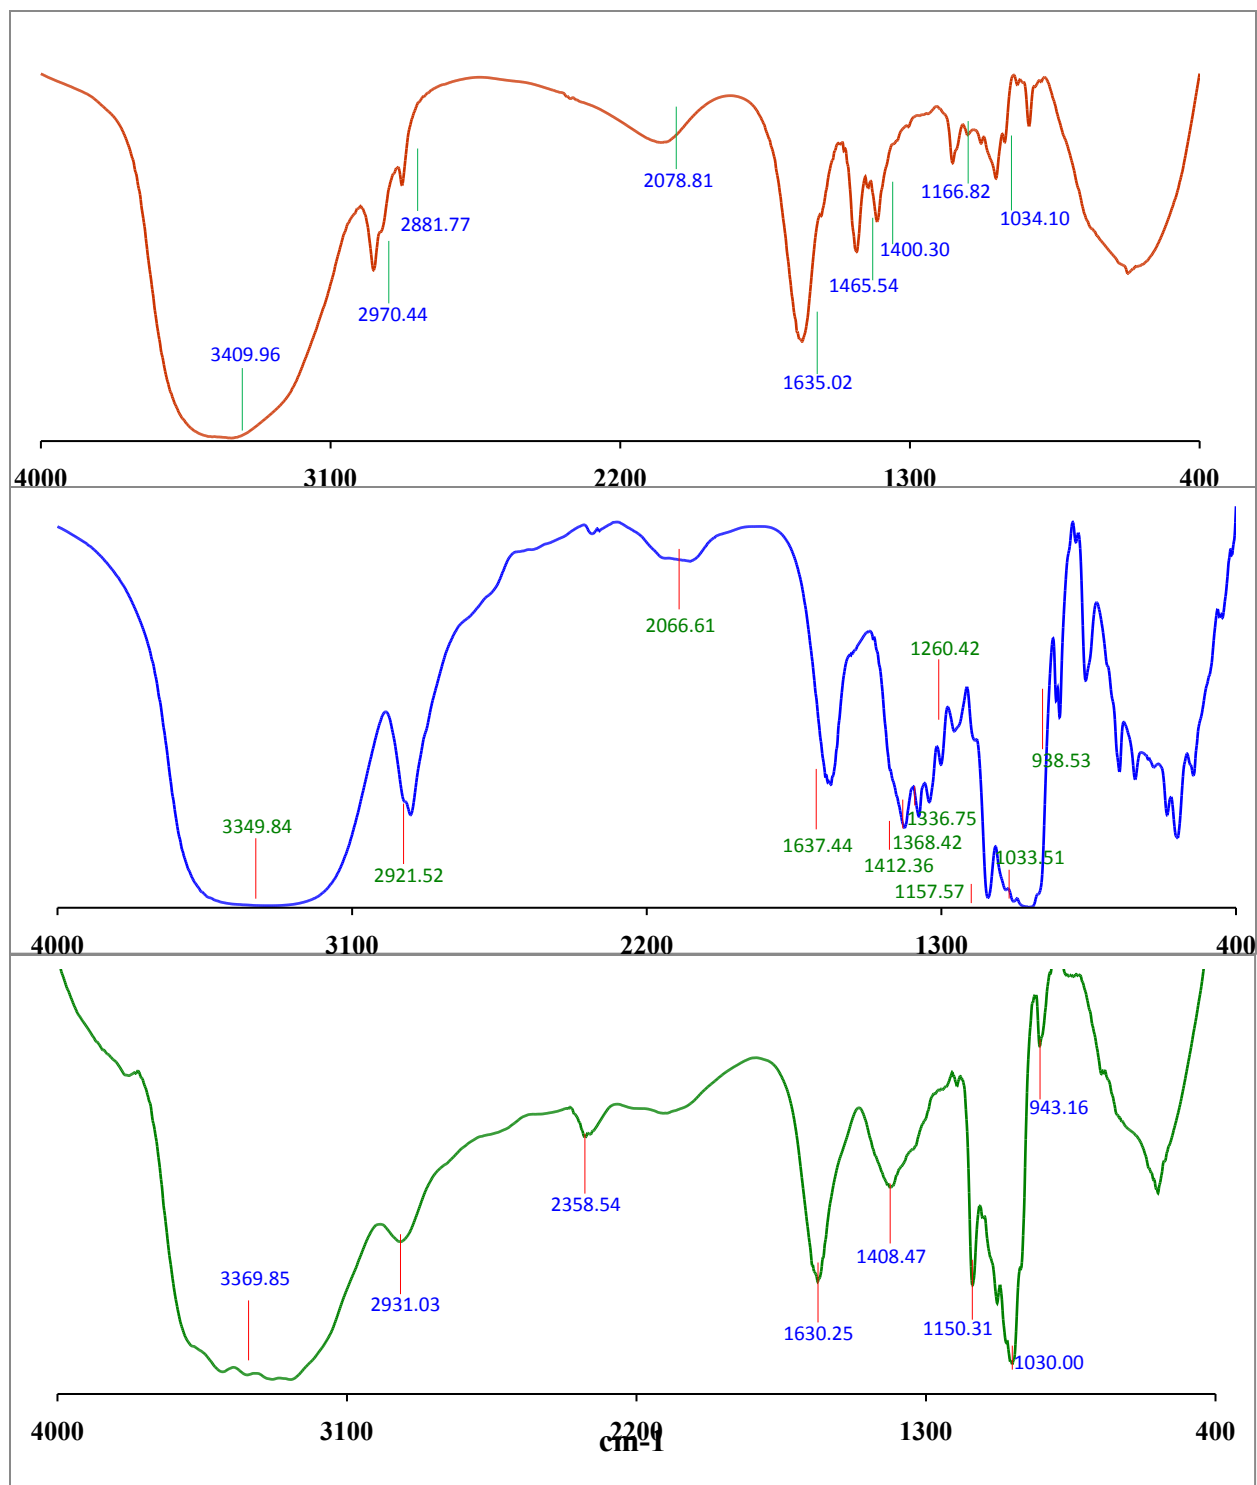

**Figure S6(b).** FTIR spectra of [BMP]Cl (top),  $\beta$ -CD (middle) and [BMP]Cl- $\beta$ -CD inclusion complex (bottom).

**Schemes:**

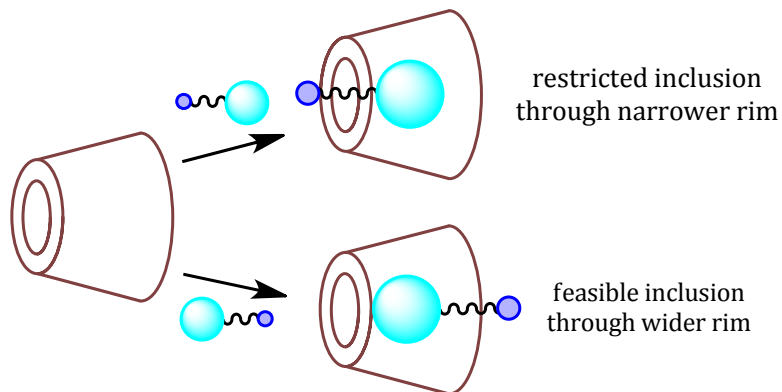

**Scheme S1.** Feasible and restricted inclusions of the guest into the host molecule.

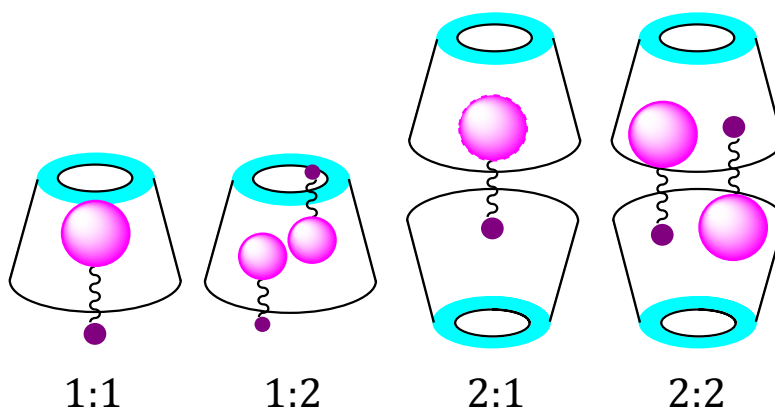

**Scheme S2.** Different stoichiometries of host-guest inclusion complexes.
